# Supplementary material for: Facile construction of highly luminescent and biocompatible gold nanoclusters by shell rigidification for two-photon pH-edited cytoplasmic and in vivo imaging
Source: Royal Society of Chemistry journal article supplement (doi:10.1039/d2nr01078j), 2022-01-01
Supplement: d2nr01078j1.pdf [file d2nr01078j1.pdf]

## Supporting information

# Facile Construction of Highly Luminescent and Biocompatible Gold Nanoclusters by Shell Rigidification for Two-photon pH-Edited Cytoplasmic and *In Vivo* Imaging

Yaowei Peng <sup>a</sup>, Lu Gao <sup>a</sup>, Guligena Pidamaimaiti <sup>b</sup>, Dan Zhao <sup>a</sup>, Lumin Zhang <sup>c</sup>, Guowei Yin <sup>d\*</sup>,  
Fu Wang <sup>a\*</sup>

<sup>a</sup> School of Biomedical Engineering, State Environmental Protection Key Laboratory of Environmental Health Impact Assessment of Emerging Contaminants, Shanghai Jiao Tong University, Shanghai 200240, China

<sup>b</sup> Key Laboratory of Pollutant Chemistry and Environmental Treatment, School of Chemistry and Environmental Science, Yili Normal University, Yining 835000, China.

<sup>c</sup> Department of Chemistry and Biochemistry, The Ohio State University 151 W. Woodruff Ave., Columbus, OH 43210, United States

<sup>d</sup> Scientific Research Center, The Seventh Affiliated Hospital of Sun Yat-sen University, Shenzhen, 518107, China

## **Reagent and materials**

All chemicals are analytical grade, Tetrachloroauric acid trihydrate ( $\text{HAuCl}_4 \cdot 3\text{H}_2\text{O}$ ), Sodium hydroxide, 6-aza-2 thiothymine (ATT) was purchased from Aladdin Reagent Co. Ltd. (Shanghai, China). PVP was purchased from Sinopharm Chemical Reagent Co., Ltd. (Shanghai, China). Rhodamine B was bought from Solarbio Science & Technology Co., Ltd. (Beijing, China). Deionized water ( $18.2 \text{ M}\Omega \text{ cm}^{-1}$ ) was used during all experiment steps.

## **Characterization**

TEM was conducted by Talos F200X G2. Fluorescence excitation and emission spectra were recorded by SF2000 (Shimadzu, Japan). UV-vis spectra were recorded by UV-1800 spectrophotometer (Shimadzu, Japan), DLS (dynamic light scattering) measurements were conducted by nanoparticle size analyzer (OMNI, USA), and XPS (X-ray photoelectron spectroscopy) spectra were obtained by using AXIS Ultra DLD (Shimadzu, Japan). Fluorescence Lifetime measurement was excited by 470 nm picosecond diode laser (PicoQuant, Germany) and detected with SPC 150 TCSPC module (Becker & Hickl GmbH, Germany).

## **Synthesis of ATT-AuNCs, Arg-AuNCs and GSH-AuNCs**

ATT-AuNCs, Arg-AuNCs and GSH-AuNCs were synthesized as previously described<sup>1,2</sup>. ATT (0.33 mL, 80 mM) containing 0.2 M NaOH was added to a  $\text{HAuCl}_4$  solution (1 mL, 10 mM), and the mixed solution was continuously stirred in the dark at room temperature for 1 hour. The synthesized ATT-AuNCs were purified by ultrafiltration (Millipore, 50 kDa) under 6000 rpm for 10 minutes. The Arg-AuNCs were obtained by addition of 0.2 mL L-arginine (40 mM) to 0.9 mL synthesized ATT-AuNCs solution. The synthesis of GSH-AuNCs is that  $\text{HAuCl}_4$  (20 mM, 0.50 mL) and GSH (100 mM, 0.15 mL) were mixed with 4.35 mL of ultrapure water at 25 °C. The reaction mixture was heated to 70 °C under gentle stirring (500 rpm) for 24 hours.

### **MTT assay**

MTT test was conducted to determine cell viability under different PVP-AuNCs concentrations. Human hepatocellular carcinomas (HepG2) cells were plated in 96-well plate (200  $\mu$ L per well) at a density of about 6000 cells per well and cultured in DMEM culture medium for 12 hours. Then the culture medium was replaced by 200  $\mu$ L medium containing different concentrations of PVP-AuNCs (0, 20, 40, 60, 80, 100, 120, 140  $\mu$ g/mL). After incubation for 24 hours, 10  $\mu$ L of MTT solution (5 mg/mL) was added to every well and then was incubated for 4 hours. Then the mixture was removed and 150  $\mu$ L DMSO was added to dissolve formazan.

## Quantum yield

The QY of the nanoclusters was calculated by the following equation.

$$QY_s = QY_f * \frac{F_s}{F_f} * \frac{A_f}{A_s} * \frac{\eta_s^2}{\eta_f^2}$$

In this equation, F are the integrated areas of fluorescence intensity between 450 nm and 650 nm, A are the absorbance at 470 nm,  $\eta$  are the solvent refractive index. The subscript “s” and “f” are “sample” and “reference” respectively. And the  $\eta_s$  is 1.33 (water) and the  $\eta_f$  is 1.36 (ethanol). The standard reference we chose is Rhodamine B dissolved in ethanol, and QY is about 71%.

## Two-photon absorption cross-section calculation

The two-photon absorption cross-section (TPACS) of the nanoclusters was calculated by the following equation.

$$\sigma_s = \frac{F_s [\phi_f C_f \eta_f]}{F_f [\phi_s C_s \eta_s]} \sigma_f$$

where  $F_s$  and  $F_f$  are the two-photon fluorescence signals of PVP-AuNCs and the reference dyes Rhodamine B respectively.  $\phi_s$  is the quantum yield of PVP-AuNCs.  $\phi_f$  is the quantum yield of Rhodamine B in methanol (0.55).  $C_s$  is the concentration of PVP-AuNCs,  $C_f$  is the concentration of Rhodamine B.  $\eta_s$  is the refractive index of the water.  $\eta_f$  is the refractive index of methanol.  $\sigma_f$  is the known TPA cross section of the reference dye Rhodamine B.

## Fluorescence Lifetime measurement

We use the double-exponential fitting function.

$$I(t) = I_0 + A_1 e^{-\frac{t}{\tau_1}} + A_2 e^{-\frac{t}{\tau_2}}$$

$$\tau_{avg} = \frac{A_1 \tau_1^2 + A_2 \tau_2^2}{A_1 \tau_1 + A_2 \tau_2}$$

**Table. S1** The parameter of fluorescence lifetime measurement

|               | Value |       | Value  |              | Value |
|---------------|-------|-------|--------|--------------|-------|
| <b>pH=4.5</b> |       |       |        |              |       |
| $\tau_1$      | 4.35  | $A_1$ | 39.52  | $\tau_{avg}$ | 48.38 |
| $\tau_2$      | 50.34 | $A_2$ | 76.77  |              |       |
| <b>pH=7</b>   |       |       |        |              |       |
| $\tau_1$      | 4.35  | $A_1$ | 61.07  | $\tau_{avg}$ | 40.67 |
| $\tau_2$      | 42.36 | $A_2$ | 134.76 |              |       |
| <b>pH=9</b>   |       |       |        |              |       |
| $\tau_1$      | 4.86  | $A_1$ | 61.54  | $\tau_{avg}$ | 30.89 |
| $\tau_2$      | 34.23 | $A_2$ | 68.13  |              |       |

## QYs and spectral properties for the AuNCs that this article mentioned

**Table.S2** Optical properties of ATT-AuNCs, Arg-AuNCs and GSH-AuNCs and PVP-AuNCs

|           | QY   | $\lambda_{ex}$ | $\lambda_{em}$ | Ref.         |
|-----------|------|----------------|----------------|--------------|
| ATT-AuNCs | 1.8% | 400 nm         | 523 nm         | 1            |
| Arg-AuNCs | 65%  | 400 nm         | 523 nm         | 1            |
| GSH-AuNCs | 15%  | 365 nm         | 610 nm         | 2            |
| PVP-AuNCs | 39%  | 474 nm         | 505 nm         | This article |

## Supplementary figures

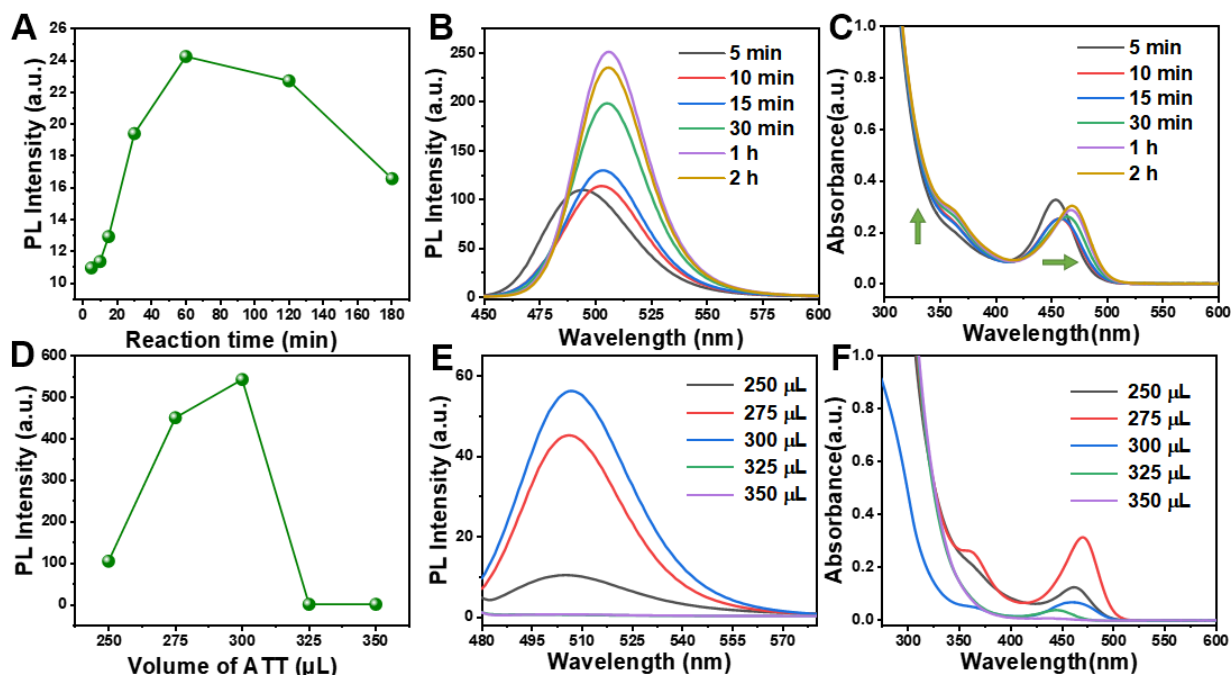

**Fig. S1** The influence of different reaction time on PL intensity (A), PL spectra (B), UV absorption spectra (C); The influence of different volume of ATT on PL intensity (D), PL spectra (E), UV absorption spectra (F).

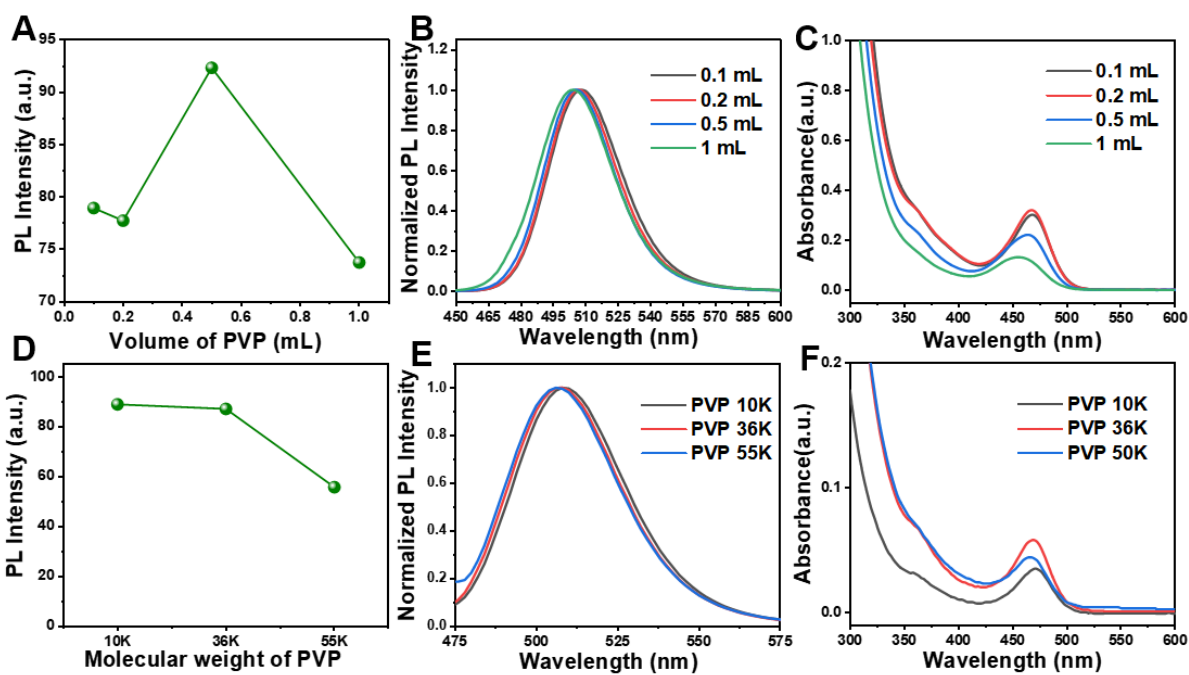

**Fig. S2** The influence of different volume of PVP (10 k) on PL intensity (A), normalized PL spectra (B), UV absorption spectra (C). The influence of different molecular weight of PVP on PL intensity (D), normalized PL spectra (E), UV absorption spectra (F).

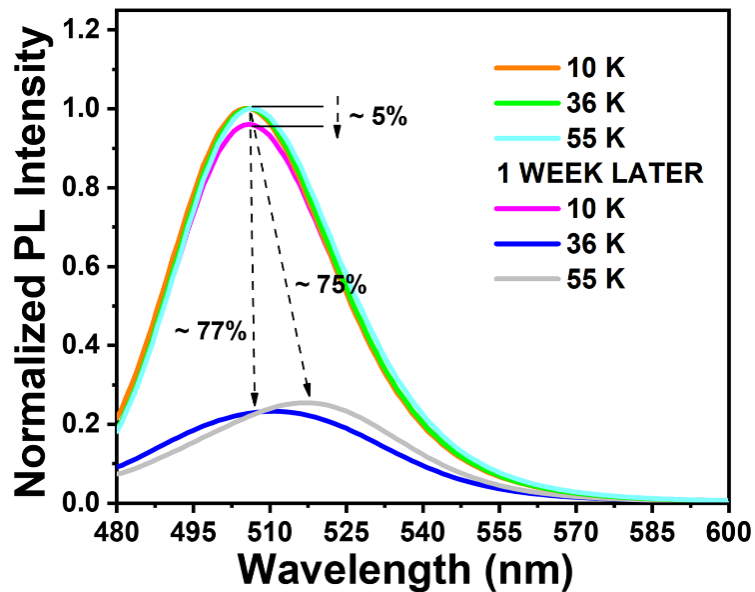

**Fig. S3** The stability of gold nanoclusters with different PVP molecular amount.

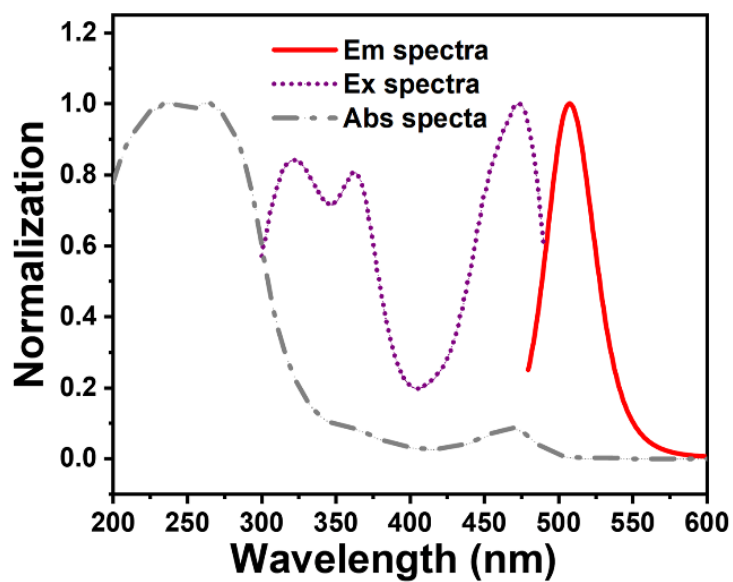

**Fig. S4** UV absorption (black curve), PL excitation (purple curve) and emission spectra (red curve) of PVP-AuNCs.



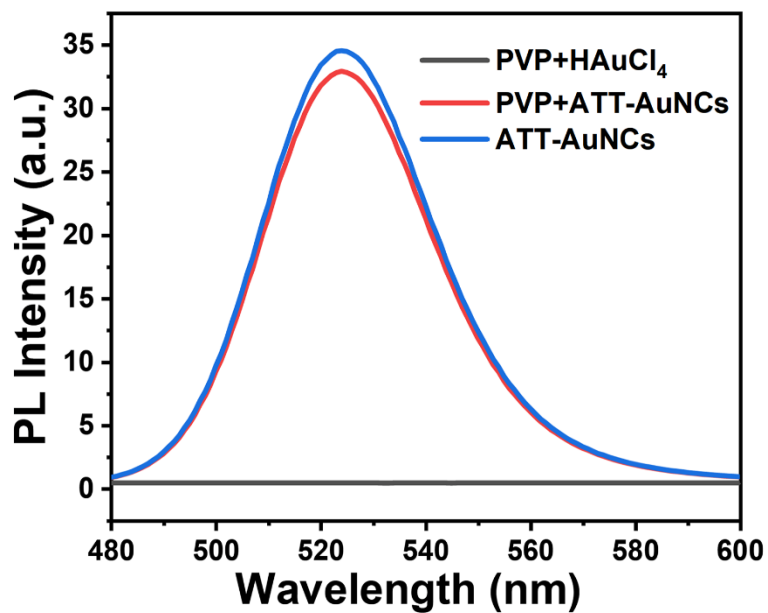

Fig. S5 The PL emission spectra of PVP+AuNCs, PVP+HAuCl<sub>4</sub> and ATT-AuNCs.

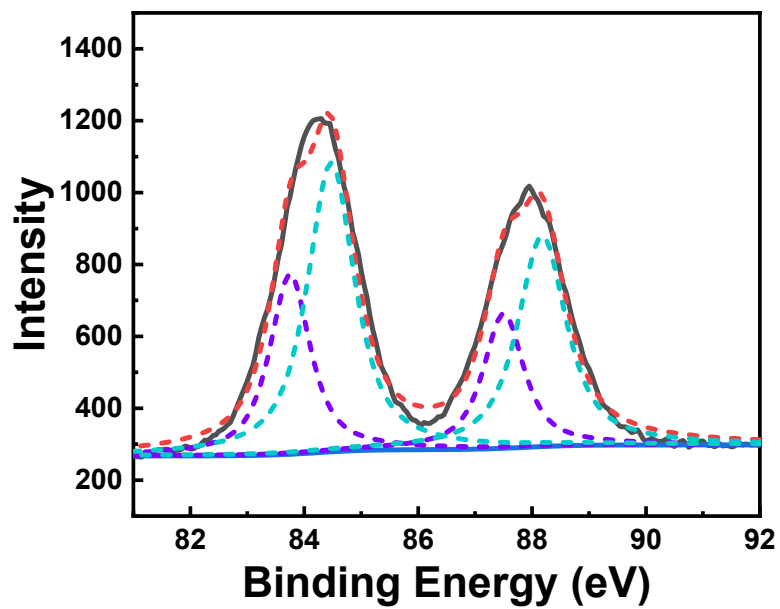

Fig. S6 The XPS spectra of Au in PVP-AuNCs.

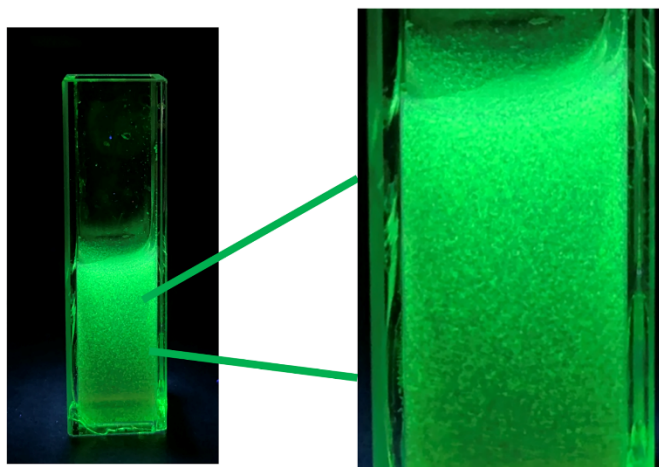

**Fig. S7** The fluorescence imaging of ATT-AuNCs incubated in DMEM culture medium after 1 day.

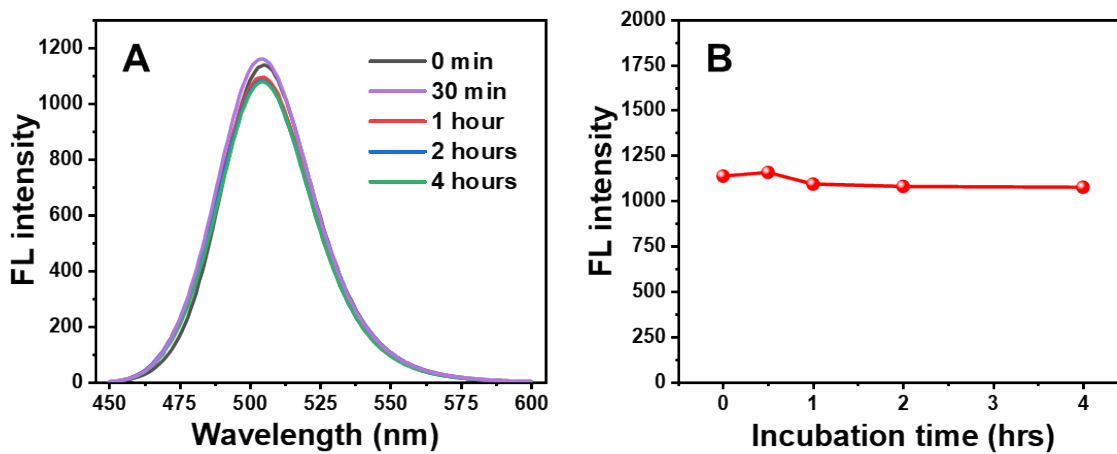

**Fig. S8** (A) The fluorescence spectra of PVP-AuNCs after different incubation time in ATP; (B) the trend of fluorescence intensity after different incubation time in ATP.

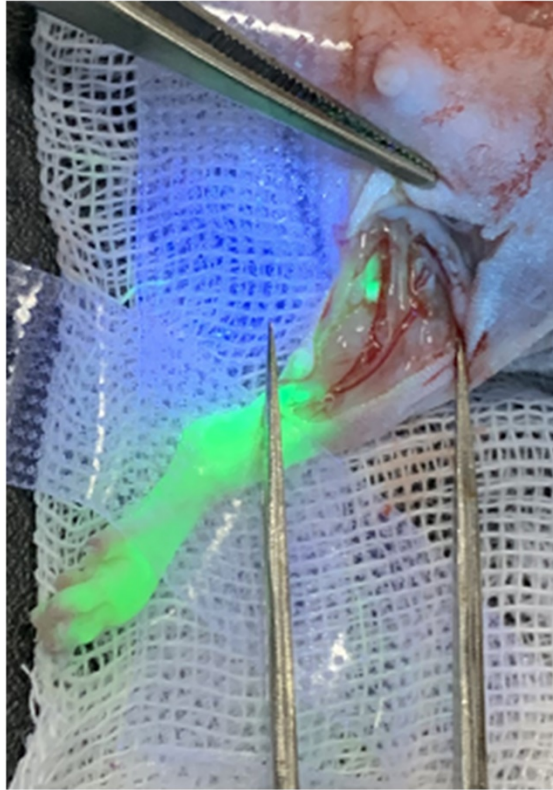

**Fig. S9** The fluorescence image of the SLN in the mouse leg under UV lamp.

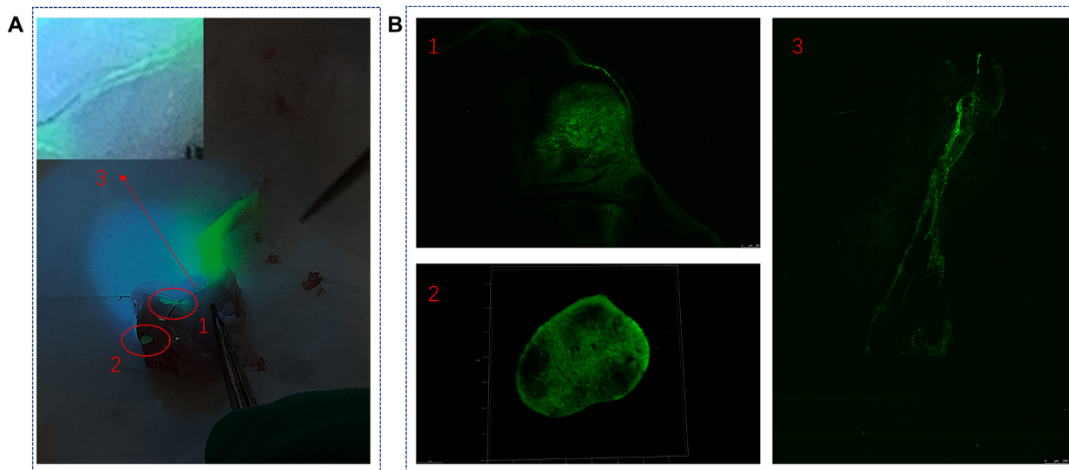

**Fig. S10** (A)The fluorescence image of the injected mouse leg under a UV lamp. (B) Two-photon fluorescence imaging of SLN (1), SCLN (2), Lymphatic vessels (3).

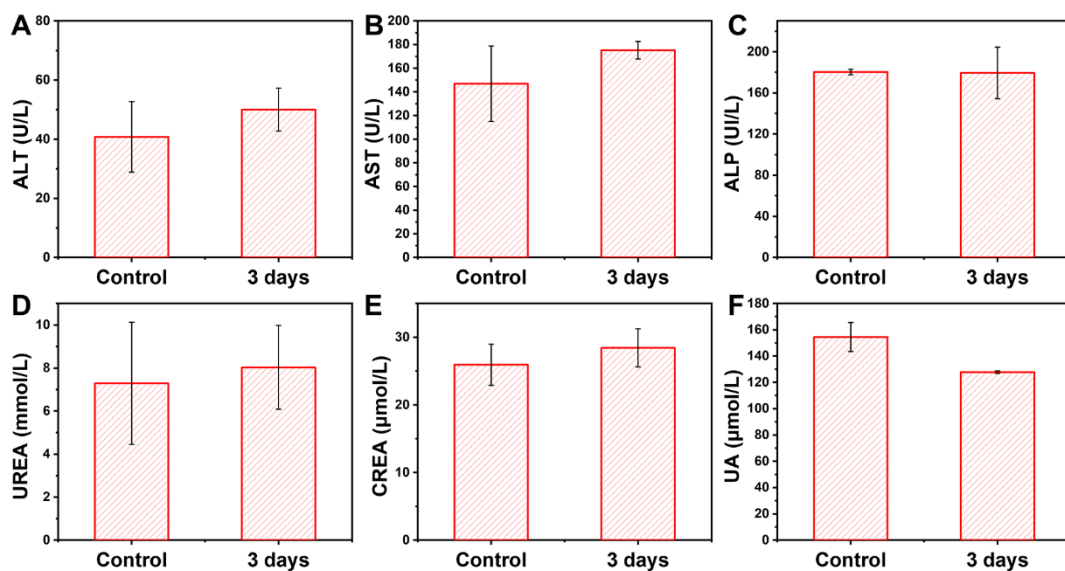

**Fig. S11** Blood biochemistry assays of (A-C) liver function markers: ALT, AST, and ALP, (D-F) kidney function markers: UREA, CRE and UA.

### References:

- 1 H.-H. Deng, X.-Q. Shi, F.-F. Wang, H.-P. Peng, A.-L. Liu, X.-H. Xia and W. Chen, *Chem. Mater.*, **2017**, **29**, 1362–1369.
- 2 Z. Luo, X. Yuan, Y. Yu, Q. Zhang, D. T. Leong, J. Y. Lee and J. Xie, *J. Am. Chem. Soc.*, **2012**, **134**, 16662–16670.
